# Supplementary material for: Winter warming is ecologically more relevant than summer warming in a cool-temperate grassland
Source: PubMed Central journal article supplement (PMC6787088; doi:10.1038/s41598-019-51221-w), 2019-10-10
Supplement: 41598_2019_51221_MOESM1_ESM.pdf [file 41598_2019_51221_MOESM1_ESM.pdf]

1 **Supplementary information to:**

2 **Winter warming is ecologically more relevant than summer warming in a cool-temperate**  
3 **grassland**

4 Juergen Kreyling, Kerstin Grant, Verena Hammerl, Mohammed A.S. Arfin Khan, Andrey V. Malyshev,  
5 Josep Peñuelas, Karin Pritsch, Jordi Sardans, Michael Schloter, Jan Schuerings, Anke Jentsch, Carl  
6 Beierkuhnlein

7 \* corresponding author: phone: +49 3834 4204131, [juergen.kreyling@uni-greifswald.de](mailto:juergen.kreyling@uni-greifswald.de)

8

9 **Supplementary information Table 1 | Species with preferential occurrence among the warming**  
10 **treatments** based on the analysis of indicator species<sup>4</sup>. The relative abundances among the warming treatments  
11 for all species with non-random occurrence ( $p < 0.05$ ) are provided. The treatment with the highest relative  
12 abundance for each species is in bold type. Plant height, according to Jäger & Rothmaler<sup>54</sup>, is used as a surrogate  
13 for potential plant biomass production<sup>55</sup> because productivity of a given species cannot be estimated from our  
14 biomass harvest as we miss monocultures per species and productivity in a community is biased by competitive  
15 effects. No significant preferential occurrence was found for 2009, the pre-treatment year. FG, functional group.

16

| Species                       | FG        | Plant height (cm) | Reference   | Summer warming | Winter warming | <i>p</i> |
|-------------------------------|-----------|-------------------|-------------|----------------|----------------|----------|
| <i>Hypochaeris radicata</i>   | forb      | 60                | <b>0.48</b> | 0.16           | 0.36           | 0.019    |
| <i>Veronica serpyllifolia</i> | forb      | 12                | <b>0.79</b> | 0.00           | 0.21           | 0.005    |
| <i>Alopecurus pratensis</i>   | graminoid | 100               | 0.32        | <b>0.36</b>    | 0.32           | 0.011    |
| <i>Luzula campestris</i>      | graminoid | 20                | 0.22        | <b>0.70</b>    | 0.09           | 0.012    |
| <i>Vicia cracca</i>           | legume    | 30-120*           | 0.08        | <b>0.58</b>    | 0.34           | 0.005    |
| <i>Holcus lanatus</i>         | graminoid | 100               | 0.30        | 0.29           | <b>0.42</b>    | 0.007    |
| <i>Arrhenatherum elatius</i>  | graminoid | 120               | 0.30        | 0.27           | <b>0.43</b>    | 0.002    |
| <i>Lotus corniculatus</i>     | legume    | 50                | 0.24        | 0.28           | <b>0.48</b>    | 0.026    |

17 \* up to 120 cm only by climbing on other species, but produces little biomass per shoot (our observations)

18

19 **Insight:** Species occurring preferentially in the winter-warming treatment consisted of very productive  
20 grasses and legumes, the productivity of species occurring preferentially in the summer-warming  
21 treatment was inconsistent, and species with preferential occurrence under reference conditions were  
22 relatively unproductive forb species.

23 **Supplementary information Figure 1| Environmental conditions in the warming treatments during**  
 24 **the four-year study period.** a) Snow depth, b) air temperature within the stand (+5 cm), c) soil  
 25 temperature (-2 cm), and d) soil moisture (-2 to -7 cm) during the study period. During the winter-warming  
 26 phases (gray blocks), black lines indicate the winter-warming treatment, and gray lines indicate the  
 27 summer-warming treatment and the reference temperatures. During the summer-warming phases (white  
 28 blocks), black lines indicate the summer-warming treatment, and gray lines indicate the winter-warming  
 29 treatment and the reference. Daily means for snow depth (n = 10) and monthly means for air and soil  
 30 temperatures (n = 10) and soil moisture (n = 30) are displayed.

31

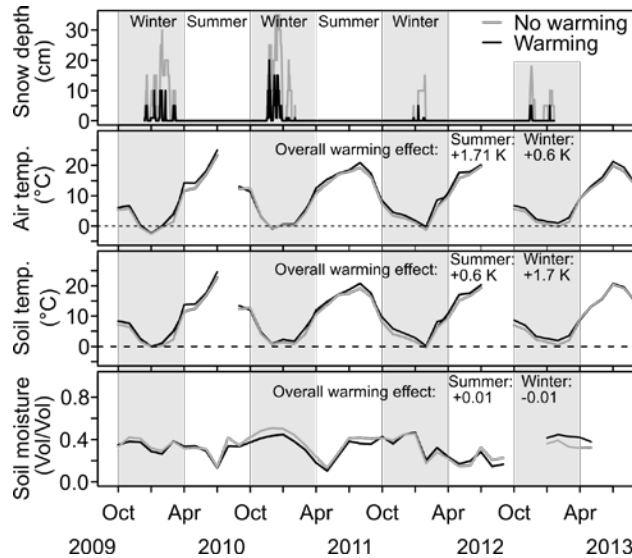

32

33 **Insight:** Four years of winter warming increased soil temperature more than summer warming (+1.7  
 34 versus +0.6 °C at -2 cm), and four years of summer warming increased air temperature more than winter  
 35 warming (+1.7 versus +0.6 °C at +5 cm), probably because the plant tissues partially absorbed the heat  
 36 generated by the heaters but only a small amount of plant biomass survived the winters.

37

38 **Supplementary information Figure 2| Potential activities of extracellular enzymes in response to**  
 39 **seasonal warming during winter 2011/12.** bgls,  $\beta$ -glucosidase; cel, cellobiohydrolase; nag, N-acetyl-  
 40 glucosaminidase; glr, glucuronidase; pho, acid phosphatase; xyl, xylosidase. Means  $\pm$  SEMs (n = 10) per  
 41 sampling date and treatment are displayed.

42

43 **Insight:** We found no evidence for winter-  
 44 warming effects on potential exoenzymatic  
 45 activity, even though the net effects on ANPP  
 46 and soil respiration were strong. Potential  
 47 exoenzymatic activities play important roles in  
 48 nutrient cycling, and warming increases their  
 49 production (Davidson & Janssens, 2006) as soil  
 50 frost decreases it (Sorensen et al. 2016). The  
 51 30% increase in winter soil respiration due to  
 52 the applied warming indicated that soil biotic  
 53 activity was considerably modified by our  
 54 winter-warming treatment. The lack of  
 55 significant warming effects on microbial  
 56 biomass and potential extracellular enzyme  
 57 activities may therefore be due to the limited  
 58 ability to detect such changes given the applied  
 59 warming.

#### 60 **Methodology:**

61 Potential extracellular enzymatic activity  
 62 (PEEA) was determined as described by Pritsch  
 63 *et al.*<sup>56</sup>. Briefly, the enzymatic assays, based on  
 64 substrates labeled with methylumbelliferone  
 65 (MUF) (Sigma-Aldrich Chemie, Merck KGaA,  
 66 Darmstadt, Germany), were prepared in black  
 67 microplates (VWR International GmbH,  
 68 Darmstadt, Germany). Substrate saturation  
 69 concentrations and incubation times for each  
 70 enzyme were:  $\beta$ -glucosidase (EC 3.2.1.21), 500  
 71  $\mu$ M and 120 min; cellobiohydrolase (EC  
 72 3.2.1.91), 400  $\mu$ M and 120 min; glucuronidase (EC 3.2.1.31), 500  $\mu$ M and 120 min; xylosidase (EC  
 73 3.2.1.37), 500  $\mu$ M and 60 min; N-acetyl-glucosaminidase (EC 3.2.1.14), 500  $\mu$ M and 60 min; acid  
 74 phosphatase (EC 3.1.3.2), 800  $\mu$ M and 40 min. Autofluorescence of the soil or quenching of the  
 75 fluorescence signal influenced by the soil was excluded by additional tests using 50  $\mu$ L of soil  
 76 suspension and 100  $\mu$ L of 300 pmol MUF instead of substrate. Fluorescence was measured on a  
 77 SpectraMax spectrofluorometer (GEMINI EM, Molecular Devices, Silicon Valley, USA) at  
 78 excitation/emission wavelengths of 365/450 nm. The amounts of MUF released were calculated based  
 79 on calibration curves and expressed as PEEA ( $\text{pmol g}^{-1} \text{dw h}^{-1}$ ). We identified the most relevant  
 80 enzymes involved in litter decomposition by assessing these enzymatic activities.

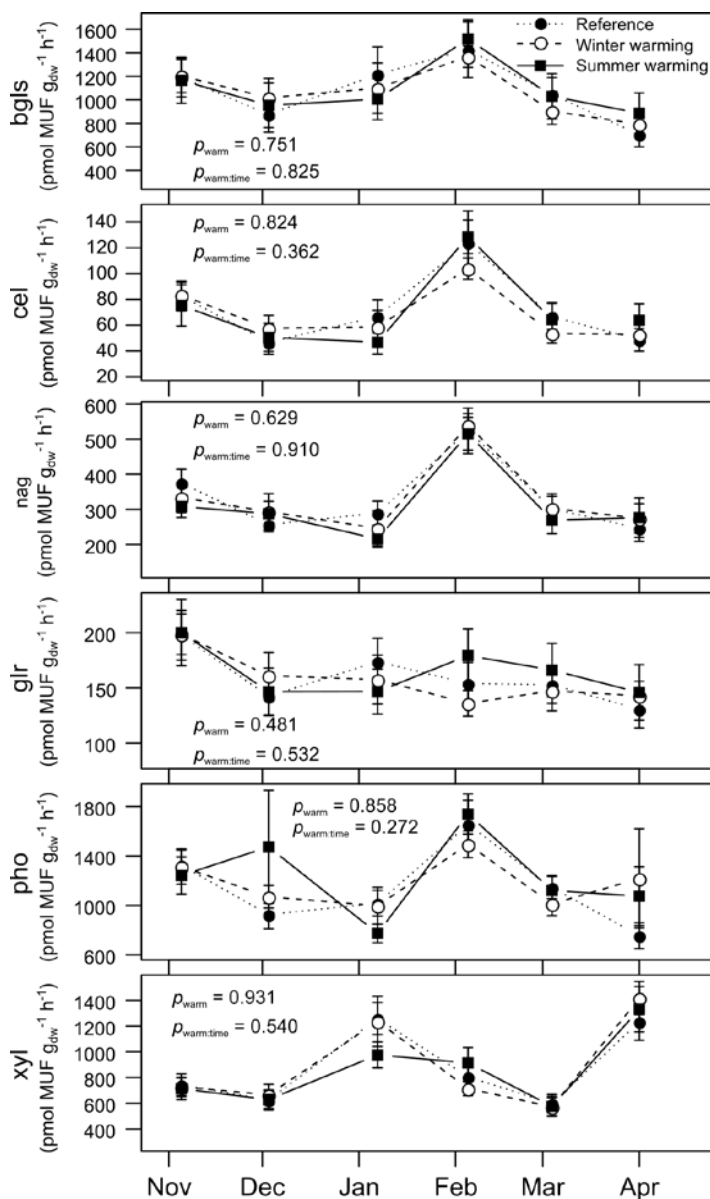

81 **Supplementary information Figure 3| Photosynthetic photon flux density (PPFD), snow depth, c)**  
 82 **air temperature (+5 cm), soil temperature (-2 cm), and soil moisture (-2 to -7 cm) during the**  
 83 **intensive winter sampling campaign of 2011/12.** Winter warming was applied throughout the depicted  
 84 period. Rolling means for snow depth, air temperature, and soil temperature (n = 10) and for soil  
 85 moisture (n = 30) over 24 h are displayed.

86  
87

88 **Insight:** Winter warming during the intensive  
 89 winter sampling campaign of 2011/2012  
 90 increased air and soil temperatures by 1.2 and  
 91 1.4 °C, respectively. Twenty-four soil freeze-  
 92 thaw cycles (i.e. changes of sign from positive  
 93 to negative and back in hourly temperature  
 94 readings) were observed in the warmed plots  
 95 compared to 46 freeze-thaw cycles in the  
 96 reference plots. Growing degree hours above 5  
 97 °C according to Anderson *et al.*<sup>57</sup> differed  
 98 only slightly between the warmed and  
 99 reference plots (915 and 909 h, respectively).

100

101

102

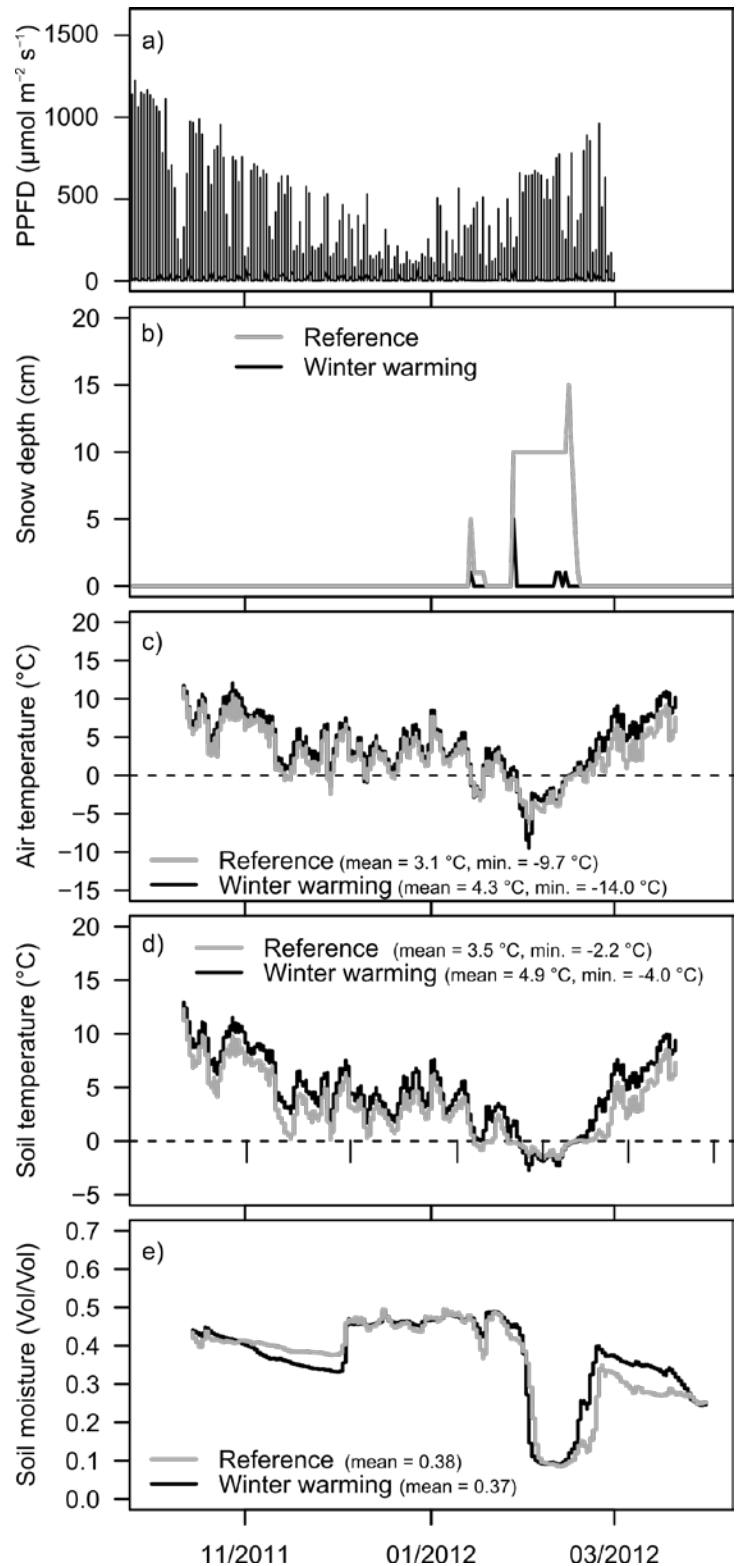

103 References Supplementary information:

104

105 54. E. J. Jäger & W. Rothmaler (eds.). *Exkursionsflora von Deutschland. Gefäßpflanzen: Atlasband*  
106 (Springer Spektrum, Berlin, 2013).

107 55. Moles, A. T. *et al.* Global patterns in plant height. *J Ecol* **97**, 923–932 (2009).

108 56. Pritsch, K. *et al.* Mycorrhizosphere responsiveness to atmospheric ozone and inoculation with  
109 *Phytophthora citricola* in a phytotron experiment with spruce/beech mixed cultures. *Plant Biology* **7**,  
110 718–727 (2005).

111 57. Anderson, J. L. & Richardson, E.A., Kesner, C.D. Validation of chill unit and flower bud phenology  
112 models for "Montmorency" sour cherry. *Acta Horticulturae* **184**, 71–78 (1986).

113
